# Supplementary material
Source: ML conference proceedings conference paper supplement (https://openaccess.thecvf.com/content/CVPR2023/html/Wu_Multiview_Compressive_Coding_CVPR_2023_paper.html)
Supplement: Supplementary file 1 [file Wu_Multiview_Compressive_Coding_CVPR_2023_supplemental.pdf]

# Supplementary Material: Multiview Compressive Coding for 3D Reconstruction

Chao-Yuan Wu Justin Johnson Jitendra Malik Christoph Feichtenhofer Georgia Gkioxari  
FAIR, Meta AI

## 1. Animations and Interactive Visualizations

We provide 360-view animations and interactive 3D visualizations for all qualitative results, in Figures 4, 7 and 9, and more in our [project page](#). Our video animations are shown in the main window and interactive 3D visualizations are available by clicking on the *3D icon*, per the instructions in the webpage.

## 2. Architecture Specifications

Table 1 describes in detail the MCC architecture for the  $E^{\text{RGB}}$  and  $E^{\text{XYZ}}$  encoders and the decoder.

The  $E^{\text{RGB}}$  and  $E^{\text{XYZ}}$  encoders follow the “ViT-Base” transformer architecture by Dosovitskiy *et al.* [4, 10]. The transformer architecture is composed of 12 layers of a 768-dimensional self-attention operator with 12 heads, referred to as multi-head attention (MHA), followed by a 3072-dimensional 2-layer MLP. The input image size is  $224 \times 224$ . The RGB image  $I$ , input to the  $E^{\text{RGB}}$  encoder, is embedded via a single convolutional layer, of a  $16 \times 16$ -sized kernel and a  $16 \times 16$  stride, to produce  $N^{\text{enc}} = 196$  tokens. The (seen) points  $P$ , input to the  $E^{\text{XYZ}}$  encoder, are first linearly projected to a 768-dimensional representation and then embedded via a single transformer layer which operates on  $16 \times 16$  non-overlapping patches as explained in Section 3.4 of the main paper and further described in Table 1, resulting also in  $N^{\text{enc}} = 196$  tokens. The single transformer layer used for the patch embeddings defines a `[cls]` token whose output is the embedding for each patch, as is commonly used in [3, 4] and referred to as a readout token.

Our decoder follows the decoder design from MAE [6]. It is composed of 8 layers of a 512-dimensional self-attention operator with 16 heads followed by a 2048-dimensional 2-layer MLP. The input to the decoder is: (a)  $N^q = 550$  3D point queries which are linearly projected to a 768-dimensional vector, and (b) input  $R$  which concatenates the  $N^{\text{enc}}$  output tokens from  $E^{\text{RGB}}$  and  $E^{\text{XYZ}}$  in the channel dimension and then linearly projects each to a 768-

dimensional vector. This results in a  $768 \times (N^q + N^{\text{enc}}) = 768 \times 746$  input to the decoder. Our decoder additionally defines a global `[cls]` token whose role is to “summarize” all inputs in the transformer and can be attended freely by other tokens.

LayerNorm [1] is used in all self-attention and MLP layers following standard practice [4, 6, 10].

## 3. Held-Out CO3D Categories

In our experiments, we hold out 10 randomly selected categories which we use as our test set. The 10 randomly selected held-out categories are:  $\{\textit{apple, ball, baseball-glove, book, bowl, carrot, cup, handbag, suitcase, toy-plane}\}$ . They have 8,453 example videos in total. Please see the original CO3D paper for more information about CO3D [8].

## 4. Additional Implementation Details for Scene Reconstruction Experiments

Similar to the object reconstruction experiments, we train MCC on Hypersim [9] with Adam [7] for 100k iterations with an effective batch size of 512 using 32 GPUs, a base learning rate of  $5 \times 10^{-5}$  with a cosine schedule and a linear warm-up for the first 10% of iterations. Training takes  $\sim 1.6$  days. We normalize each scene to have zero-mean and unit-variance. At inference time, we predict points up to 6.0 units (*i.e.*,  $6 \times$  standard deviation) away from the camera origin. Since we aim at predicting the scene in front of the camera, we use the camera view coordinate system ( $X$ -axis points top/down,  $Y$ -axis points left/right, and  $Z$ -axis points out from the image plane). We randomly scale augment images by  $s \in [0.8, 1.2]$ , as in the object reconstruction model, but do not perform rotation augmentation. Other implementation details follow the CO3D experiments.

| Stage              | Operators                                                                     | Output sizes              |
|--------------------|-------------------------------------------------------------------------------|---------------------------|
| Input $I$          | -                                                                             | $3 \times 224 \times 224$ |
| Patch embed        | Conv $16 \times 16$ , 768<br>(stride $16 \times 16$ )                         | $768 \times 196$          |
| Transformer layers | $\begin{bmatrix} \text{MHA}(768) \\ \text{MLP}(3072) \end{bmatrix} \times 12$ | $768 \times 196$          |

(a) Encoder  $E^{\text{RGB}}$ 

| Stage              | Operators                                                                                                                                      | Output sizes                |
|--------------------|------------------------------------------------------------------------------------------------------------------------------------------------|-----------------------------|
| Input $P$          | -                                                                                                                                              | $3 \times 224 \times 224$   |
| Embed              | Linear, 768                                                                                                                                    | $768 \times 224 \times 224$ |
| Patch embed        | $\begin{bmatrix} \text{MHA}(768) \\ \text{MLP}(1536) \\ [\text{cls}] \text{ readout} \end{bmatrix} \times 1$<br>(on each $16 \times 16$ patch) | $768 \times 196$            |
| Transformer layers | $\begin{bmatrix} \text{MHA}(768) \\ \text{MLP}(3072) \end{bmatrix} \times 12$                                                                  | $768 \times 196$            |

(b) Encoder  $E^{\text{XYZ}}$ 

| Stage           | Operators   | Output sizes      |
|-----------------|-------------|-------------------|
| Input encodings | -           | $768 \times 196$  |
| Concat          | Concat      | $1536 \times 196$ |
| Linear          | Linear, 768 | $768 \times 196$  |

(c) Fusion Module  $f$ 

| Stage              | Operators                                                                    | Output sizes     |
|--------------------|------------------------------------------------------------------------------|------------------|
| Input queries      | -                                                                            | $3 \times 550$   |
| Embed              | Linear, 768                                                                  | $768 \times 550$ |
| Concat with $R$    | Concat                                                                       | $768 \times 746$ |
| Transformer layers | $\begin{bmatrix} \text{MHA}(512) \\ \text{MLP}(2048) \end{bmatrix} \times 8$ | $768 \times 746$ |

(d) Decoder  $Dec$ 

Table 1. **Architecture specification** for each part of the MCC model.  $\text{MHA}(c)$ : Multi-Head Attention [10] with  $c$  channels.  $\text{MLP}(c')$ : MultiLayer Perceptron with  $c'$  channels.  $[\text{cls}]$  readout: feature readout with the  $[\text{cls}]$  token [3,4]. Here, we use the default choice of  $N^q = 550$  queries. We omit the optional  $[\text{cls}]$  token in the outputs of the transformers for clarity.

## 5. Additional Experiments

**Comparison to Prior Works on Generalization.** Fig. 2 compares MCC with PoinTr [11], trained on CO3D, and Mesh R-CNN [5], trained on ShapeNet [2] on a challenging DALL·E 2 image. Both baselines struggle possibly due to the large domain gap with their respective training sets, while Mesh R-CNN seems to do a bit better than PoinTr. MCC, trained on the same dataset as PoinTr, performs much better than both.

### Qualitative Results of ‘Detailed’ vs. ‘Global Pooling’.

Table 1(d) in the main paper shows that the default ‘detailed’ feature conditioning design outperforms ‘global’ by

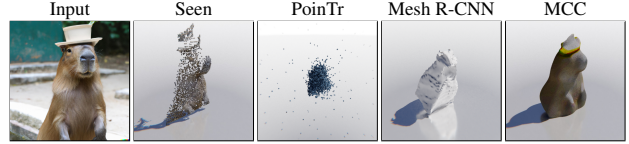

Table 2. **Comparison to Prior Works on Generalization.** MCC performs much better than PoinTr [11] and Mesh R-CNN [5] on the challenging DALL·E 2 image.

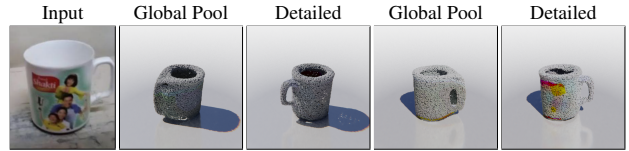

Figure 1. **‘Detailed’ vs. ‘Global Pooling’ for Feature Conditioning.** The default ‘detailed’ design shows better geometry and texture details.

| $N^q$         | Acc  | Cmp  | F1          |
|---------------|------|------|-------------|
| 250           | 46.6 | 75.7 | 55.3        |
| 550 (default) | 47.5 | 76.0 | <b>56.7</b> |
| 1000          | 47.2 | 76.2 | <u>56.3</u> |

Figure 2. **Number of training queries  $N^q$ .** Increasing  $N^q$  beyond the default choice of 550 does not perform better.

2.2% in F1. Fig. 1 presents a qualitative example. We can see that the ‘detailed’ design shows better geometry and texture details.

**Impact of the Number of Training Queries  $N^q$ .** Fig. 2 presents the ablation results. We observe that overall MCC is not very sensitive to the choice of  $N^q$ . Also, further increasing  $N^q$  beyond the default choice of 550 does not perform better.

## References

- [1] Jimmy Lei Ba, Jamie Ryan Kiros, and Geoffrey E Hinton. Layer normalization. *arXiv preprint arXiv:1607.06450*, 2016. 1
- [2] Angel X Chang, Thomas Funkhouser, Leonidas Guibas, Pat Hanrahan, Qixing Huang, Zimo Li, Silvio Savarese, Manolis Savva, Shuran Song, Hao Su, et al. ShapeNet: An information-rich 3D model repository. *arXiv preprint arXiv:1512.03012*, 2015. 2
- [3] Jacob Devlin, Ming-Wei Chang, Kenton Lee, and Kristina Toutanova. BERT: Pre-training of deep bidirectional transformers for language understanding. In *NAACL*, 2019. 1, 2
- [4] Alexey Dosovitskiy, Lucas Beyer, Alexander Kolesnikov, Dirk Weissenborn, Xiaohua Zhai, Thomas Unterthiner, Mostafa Dehghani, Matthias Minderer, Georg Heigold, Sylvain Gelly, et al. An image is worth 16x16 words: Trans-

- formers for image recognition at scale. In *ICLR*, 2021. 1, 2
- [5] Georgia Gkioxari, Jitendra Malik, and Justin Johnson. Mesh R-CNN. In *ICCV*, 2019. 2
  - [6] Kaiming He, Xinlei Chen, Saining Xie, Yanghao Li, Piotr Dollár, and Ross Girshick. Masked autoencoders are scalable vision learners. In *CVPR*, 2022. 1
  - [7] Diederik P Kingma and Jimmy Ba. Adam: A method for stochastic optimization. In *ICLR*, 2015. 1
  - [8] Jeremy Reizenstein, Roman Shapovalov, Philipp Henzler, Luca Sbordone, Patrick Labatut, and David Novotny. Common objects in 3D: Large-scale learning and evaluation of real-life 3D category reconstruction. In *ICCV*, 2021. 1
  - [9] Mike Roberts, Jason Ramapuram, Anurag Ranjan, Atulit Kumar, Miguel Angel Bautista, Nathan Paczan, Russ Webb, and Joshua M Susskind. Hypersim: A photorealistic synthetic dataset for holistic indoor scene understanding. In *ICCV*, 2021. 1
  - [10] Ashish Vaswani, Noam Shazeer, Niki Parmar, Jakob Uszkoreit, Llion Jones, Aidan N Gomez, Łukasz Kaiser, and Illia Polosukhin. Attention is all you need. In *NeurIPS*, 2017. 1, 2
  - [11] Xumin Yu, Yongming Rao, Ziyi Wang, Zuyan Liu, Jiwen Lu, and Jie Zhou. PoinTr: Diverse point cloud completion with geometry-aware transformers. In *ICCV*, 2021. 2
